# Supplementary material for: A human antibody against human endothelin receptor type A that exhibits antitumor potency
Source: PubMed Central journal article supplement (PMC8492878; doi:10.1038/s12276-021-00678-9), 2021-09-29
Supplement: 12276_2021_678_MOESM1_ESM.pdf [file 12276_2021_678_MOESM1_ESM.pdf]

**SUPPLEMENTARY INFORMATION**

**A Human Antibody against Human Endothelin Receptor  
Type A that Exhibits Antitumor Potency**

Man-Seok Ju<sup>1,2,#</sup>, Hye-Mi Ahn<sup>3,#</sup>, Seong-Gu Han<sup>4,#</sup>, Sanghwan Ko<sup>1,2</sup>, Jung-Hyun Na<sup>5,6</sup>,  
Migyeong Jo<sup>1,7</sup>, Chung Su Lim<sup>8</sup>, Byoung Joon Ko<sup>9</sup>, Yeon Gyu Yu<sup>4</sup>, Won-Kyu Lee<sup>8,\*</sup>, Youn-Jae  
Kim<sup>3,\*</sup>, Sang Taek Jung<sup>1,2,7,\*</sup>

<sup>1</sup>*Department of Biomedical Sciences, Graduate School, Korea University, Seoul, 02841,  
Republic of Korea*

<sup>2</sup>*Institute of Human Genetics, Korea University College of Medicine, Seoul, 02841, Republic of  
Korea*

<sup>3</sup>*Division of Translational Science, Research Institute, National Cancer Center, Goyang,  
Gyeonggi-do, 10408, Republic of Korea*

<sup>4</sup>*Biopharmaceutical Chemistry Major, School of Applied Chemistry, Kookmin University, Seoul,  
02707, Republic of Korea*

<sup>5</sup>*Department of Pharmaceutical Engineering, Sangji University, Wonju-si, Gangwon-do, 26339,  
Republic of Korea*

<sup>6</sup>*Research Institute of Korean Medicine, Sangji University, Wonju-si, Gangwon-do, 26339,  
Republic of Korea*

<sup>7</sup>*BK21 Graduate Program, Department of Biomedical Sciences, Korea University College of  
Medicine, Seoul, 02841, Republic of Korea*

<sup>8</sup>*New Drug Development Center, Osong Medical Innovation Foundation, Cheongju,*

*Chungcheongbuk-do, 28160, Republic of Korea*

*<sup>9</sup>School of Biopharmaceutical and Medical Sciences, Sungshin Women's University, Seoul,  
02844, Republic of Korea*

#These authors contributed equally to this work.

**\*Correspondence:**

Sang Taek Jung (Email: [sjung@korea.ac.kr](mailto:sjung@korea.ac.kr))

Youn-Jae Kim (Email: [yjkim@ncc.re.kr](mailto:yjkim@ncc.re.kr))

Won-Kyu Lee (Email: [gre7@kbiohealth.kr](mailto:gre7@kbiohealth.kr))

## Supplementary Figure Legends

**Supplementary Figure 1.** Analysis of ET<sub>A</sub> mRNA expression in normal colon and tumor colon tissues from the Oncomine database (n is number of samples).

**Supplementary Table 1.** Primers used in this study (underlining indicates the restriction enzyme sites).

**Supplementary Table 2.** Plasmids used in this study.

**Supplementary Table 3.** Output phage titers after each round of screening of the human scFv phage display library against human ET<sub>A</sub>.

**Supplementary Figure 1.** Analysis of ET<sub>A</sub> mRNA expression in normal colon and tumor colon tissues from the Oncomine database (n is number of samples).

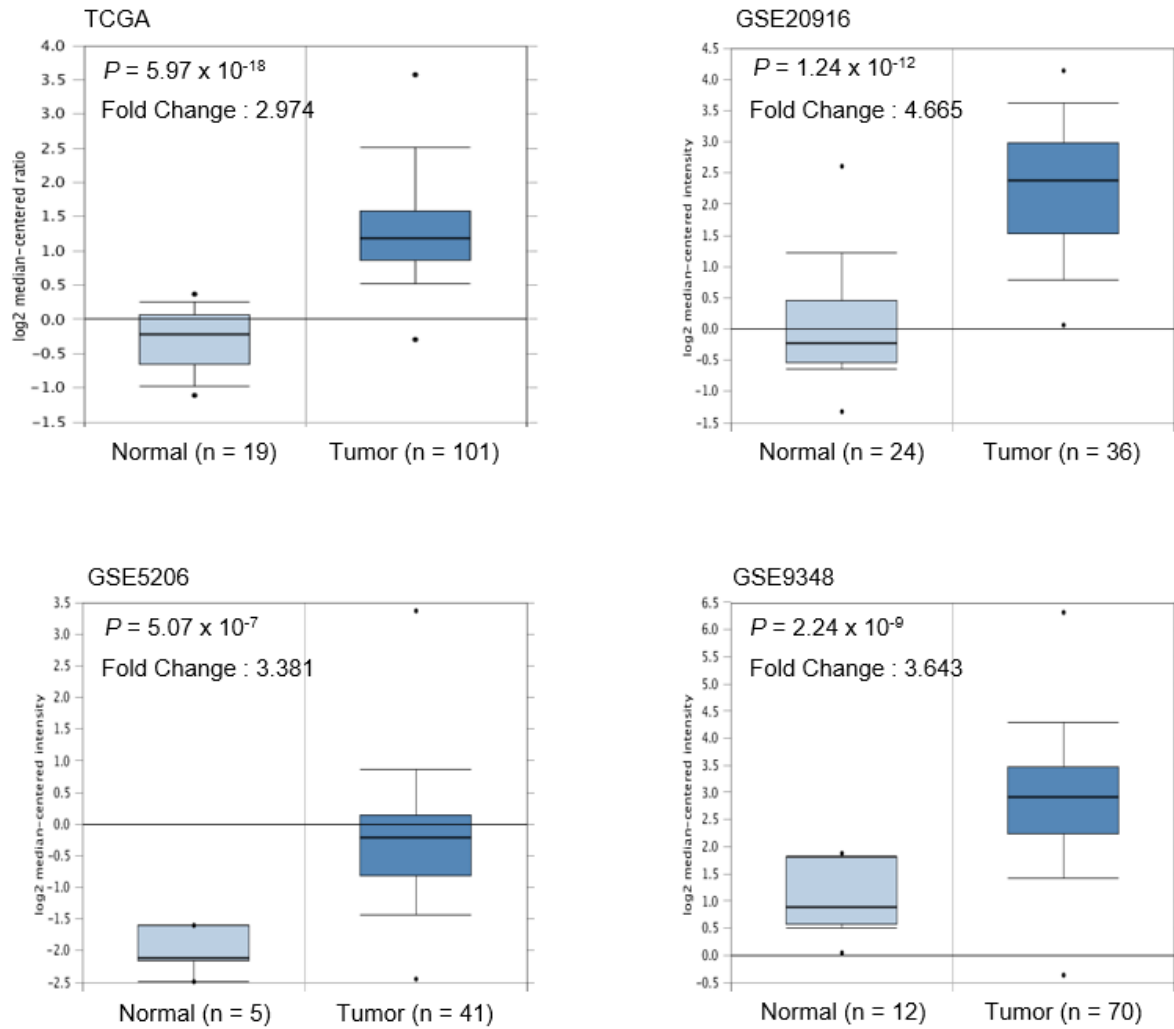

**Supplementary Table 1.** Primers used in this study (underlining indicates the restriction enzyme sites).

| Primer Name | Primer Nucleotide Sequence (5' → 3')                                                                                       |
|-------------|----------------------------------------------------------------------------------------------------------------------------|
| MSJ#01      | GAGCCTGGTGCCGCGCGGCTCCCGGGACAACCTGAGAGATACAGTGCAA                                                                          |
| MSJ#02      | GGTGATGGTGATGGTGAGAAGCTTCATTCATGGAGTCTTTATGCGACGAA                                                                         |
| MSJ#03      | GCGGAATTCATATGCTAAAGCTCCTTGACAACCTGGGACAGCGTGACCTCCACCTTCAGC<br>AAGCTGCGCGAACAGCTCGGCCCTGTGACCCAGGAGTTCTGGGATAACCTGGAAAAGG |
| MSJ#04      | CTCCTGCCACTTCTTCTGGAAGTCGTCAGGTAGGGCTGCACCTTGGCCTTACCTCCT<br>CCAGATCCTTGCTCATCTGCCTCAGGCCCTGTCTCCTTTCCAGGTTATCCAGAA        |
| MSJ#05      | CCAGAAGAAGTGGCAGGAGGATGGAGCTACCGCCAGAAGGTGGAGCCGTGCGCGC<br>AGAGCTCCAAGAGGGCGCGGCCAGAAGCTGCACGAGCTGCAAGAGAAGCTGAGCCACT      |
| MSJ#06      | GGCGCGCGCCAAGCGCTGGCGCAGCTCGTCGCTGTAGGGGGCCAGATGCGTGCGCAGC<br>GCGTCCACATGGGCGCGCGCGGTCGCGCATCTCTCGCCAGTGGGCTCAGCTTCTCTT    |
| MSJ#07      | TTGGCCGCGCCTTGAGGCTCTCAAGGAGAACGGCGCGCCAGACTGGCCGAGTACCAC<br>GCCAAGGCCACCGAGCATCTGAGCAGCTCAGCGAGAAGGCCAAGCCGCGCTCGAGGAC    |
| MSJ#08      | GAATTCGATCCTCACTGGGTGTTGAGCTTCTAGTGTACTCCTCGAGAGCCTCAGGAAG<br>CTGACCTTGAAGCTCCTCAGCACGGGCAGCAGGCCTTGGCGGAGGTCTCAGCGCGGG    |
| MSJ#09      | GCTACCGTGGCCAGCCGGCCATGGCGATGGCGCAGGTGCAGCTGGTGCAGTCTGG                                                                    |
| MSJ#10      | GCTACCGTGGCCAGCCGGCCATGGCGATGGCGCAGGTCACTTAAGGGAGTCTGG                                                                     |
| MSJ#11      | GCTACCGTGGCCAGCCGGCCATGGCGATGGCGGAGGTGCAGCTGGTGGAGTCTGG                                                                    |
| MSJ#12      | GCTACCGTGGCCAGCCGGCCATGGCGATGGCGCAGGTGCAGCTCAGGAGTCTGGG                                                                    |
| MSJ#13      | GCTACCGTGGCCAGCCGGCCATGGCGATGGCGGAGGTGCAGCTGTTGAGTCTGC                                                                     |
| MSJ#14      | GCTACCGTGGCCAGCCGGCCATGGCGATGGCGCAGGTACAGCTGCAGCAGTACAG                                                                    |
| MSJ#15      | CAGATCCACCTCCACCGAACCTCCACCTCCAGAGCTCCCTCCACCTGAGGAGACGGTGACCAGGGTGCC                                                      |
| MSJ#16      | CAGATCCACCTCCACCGAACCTCCACCTCCAGAGCTCCCTCCACCTGAAGAGACGGTGACCATTGTCCC                                                      |
| MSJ#17      | CAGATCCACCTCCACCGAACCTCCACCTCCAGAGCTCCCTCCACCTGAGGAGACGGTGACCAGGGTTCC                                                      |
| MSJ#18      | CAGATCCACCTCCACCGAACCTCCACCTCCAGAGCTCCCTCCACCTGAGGAGACGGTGACCGTGGTTCC                                                      |
| MSJ#19      | GGTCCGGTGGAGGTGGATCTGGTGGAGGTGCTAGCGACATCCAGATGACCCAGTCTCC                                                                 |
| MSJ#20      | GGTCCGGTGGAGGTGGATCTGGTGGAGGTGCTAGCGATGTTGTGATGACTCAGTCTCC                                                                 |
| MSJ#21      | GGTCCGGTGGAGGTGGATCTGGTGGAGGTGCTAGCGAAATTGTGTTGACGCAGTCTCC                                                                 |
| MSJ#22      | GGTCCGGTGGAGGTGGATCTGGTGGAGGTGCTAGCGACATCGTATGACCCAGTCTCC                                                                  |
| MSJ#23      | GGTCCGGTGGAGGTGGATCTGGTGGAGGTGCTAGCGAAACGACACTCAGCAGTCTCC                                                                  |
| MSJ#24      | GGTCCGGTGGAGGTGGATCTGGTGGAGGTGCTAGCGAAATTGTGCTGACTCAGTCTCC                                                                 |
| MSJ#25      | GGTCCGGTGGAGGTGGATCTGGTGGAGGTGCTAGCCAGTCTGTGTTGACGCAGCCGCC                                                                 |
| MSJ#26      | GGTCCGGTGGAGGTGGATCTGGTGGAGGTGCTAGCCAGTCTGCCCTGACTCAGCCTGC                                                                 |
| MSJ#27      | GGTCCGGTGGAGGTGGATCTGGTGGAGGTGCTAGCTCCTATGTGCTGACTCAGCCACC                                                                 |
| MSJ#28      | GGTCCGGTGGAGGTGGATCTGGTGGAGGTGCTAGCTCTTCTGAGCTGACTCAGGACCC                                                                 |
| MSJ#29      | GGTCCGGTGGAGGTGGATCTGGTGGAGGTGCTAGCCAGTTATACTGACTCAACCGCC                                                                  |
| MSJ#30      | GGTCCGGTGGAGGTGGATCTGGTGGAGGTGCTAGCCAGGCTGTGCTCACTCAGCCGTC                                                                 |
| MSJ#31      | GGTCCGGTGGAGGTGGATCTGGTGGAGGTGCTAGCAATTTTATGCTGACTCAGCCCCA                                                                 |
| MSJ#32      | GGTGCTGGCCCCGAGGCCCGTACGTTTGATTTCCACCTTGGTCCC                                                                              |
| MSJ#33      | GGTGCTGGCCCCGAGGCCCGTACGTTTGATCTCCAGCTTGGTCCC                                                                              |
| MSJ#34      | GGTGCTGGCCCCGAGGCCCGTACGTTTGATATCCACTTTGGTCCC                                                                              |
| MSJ#35      | GGTGCTGGCCCCGAGGCCCGTACGTTTGATCTCCACCTTGGTCCC                                                                              |
| MSJ#36      | GGTGCTGGCCCCGAGGCCCGTACGTTTAATCTCCAGTCTGTCCC                                                                               |
| MSJ#37      | GGTGCTGGCCCCGAGGCCCGTACCTAGGACGGTGACCTTGGTCCC                                                                              |
| MSJ#38      | GGTGCTGGCCCCGAGGCCCGTACCTAGGACGGTGACCTTGGTCCC                                                                              |
| MSJ#39      | GGTGCTGGCCCCGAGGCCCGTACCTAAAACGGTGAGCTGGGTCCC                                                                              |
| MSJ#40      | GCTACCGTGGCCAGCCGGCCATGGCG                                                                                                 |
| MSJ#41      | GGCCTCGGGGGCCAGCACC                                                                                                        |
| MSJ#42      | CCACAGGCGCGCACTCCGAGGTGCAGCTGGTGGAG                                                                                        |
| MSJ#43      | CCTGGTCACCGTCTCCTCAGCAAGCTTCAAGGGCCCA                                                                                      |
| MSJ#44      | TGGGCCCTTGAAGCTTGTGAGGAGACGGTGACCAGG                                                                                       |
| MSJ#45      | CGAGCTICTAGATCATTTACCCGGGGACAGGGAG                                                                                         |
| MSJ#46      | CCACAGGCGCGCACTCCGGACATCGTGATGACCCAGTCTCC                                                                                  |
| MSJ#47      | GGACCAAGGTGGAGATCAAACGTACGGCGGCCGCAC                                                                                       |
| MSJ#48      | GTGCGGCCGCCGTACGTTTGATCTCCACCTTGGTCC                                                                                       |
| MSJ#49      | CGAGCTTCTAGAGCACTCTCCCCTGTTGAAGC                                                                                           |
| MSJ#50      | GGTCCCTTGTGAGCCTTGA                                                                                                        |
| MSJ#51      | AGGAAASGTGCCTGTGATGGG                                                                                                      |

**Supplementary Table 2.** Plasmids used in this study.

| Plasmid                | Relevant characteristics                                                                                                      | Reference or source |
|------------------------|-------------------------------------------------------------------------------------------------------------------------------|---------------------|
| pP9                    | Ap <sub>r</sub> , T7 promoter, thrombin cleavage site, P9 gene in pRSET <sub>A</sub>                                          | 20                  |
| pP9-mET <sub>A</sub>   | Ap <sub>r</sub> , T7 promoter, thrombin cleavage site, P9 gene, mouse ET <sub>A</sub> in pP9                                  | This study          |
| pP9-hET <sub>A</sub>   | Ap <sub>r</sub> , T7 promoter, thrombin cleavage site, P9 gene, human ET <sub>A</sub> in pP9                                  | 20                  |
| pET28a(+)              | Kan <sub>r</sub> , T7 promoter, thrombin cleavage site, polyhistidine tag                                                     | Novagen             |
| pET28-MSP1             | Kan <sub>r</sub> , T7 promoter, thrombin cleavage site, N-terminal polyhistidine tag                                          | This study          |
| pMAZ-IgH-GlycoT        | Trastuzumab H chain gene in pMAZ-IgH-H23                                                                                      | 21                  |
| pMAZ-IgL-GlycoT        | Trastuzumab L chain gene in pMAZ-IgL-H23                                                                                      | 21                  |
| pComb3X                | Ap <sub>r</sub> , lac promoter, polyhistidine tag, HA tag in phagemid                                                         | 24                  |
| pEL3X                  | Modified <i>Sfi</i> I restriction nucleotide sequence in pComb3X                                                              | This study          |
| pET28a-G <sub>α3</sub> | Kan <sub>r</sub> , T7 promoter, thrombin cleavage site, N-terminal polyhistidine tag, human G <sub>α3</sub> gene in pET28a(+) | 25                  |

**Supplementary Table 3.** Output phage titers after each round of screening of the human scFv phage display library against human ET<sub>A</sub>.

| Round                       | 1               | 2                 | 3               | 4                 | 5               |
|-----------------------------|-----------------|-------------------|-----------------|-------------------|-----------------|
| Number of washes            | 2               | 3                 | 3               | 6                 | 10              |
| Output phage titer (cfu/ml) | $2 \times 10^6$ | $1.5 \times 10^6$ | $2 \times 10^6$ | $1.8 \times 10^5$ | $1 \times 10^6$ |
